# Supplementary material
Source: Springer Nature journal article supplement (https://www.springermedizin.de/resource/supplementary/12913_2008_1011_MOESM3_ESM.pdf/9536132)

**ATTITUDE**

(Behavioural beliefs)

**SUBJECTIVE NORM**

(Normative beliefs)

**PERCEIVED  
BEHAVIOURAL  
CONTROL**

(Control beliefs)

**BEHAVIOURAL  
INTENTION**

**BEHAVIOUR**

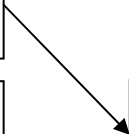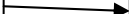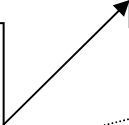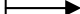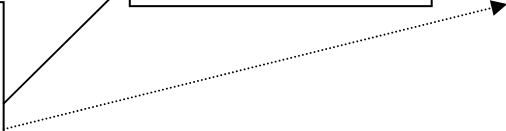

Supplement: MOESM3 [file 9536132]
